# Supplementary material
Source: PubMed Central journal article supplement (PMC9234064)
Supplement: mmc1.pdf [file mmc1.pdf]

## Online Appendix to “Food Insecurity During the First Year of the COVID-19 Pandemic in Four African Countries”

### Differential Attrition

The top panel of Figure [A2](#) shows that the share of urban respondents was fairly stable over the period of interest. Ethiopia had the highest share of urban respondents at around 70 percent. In the other three countries, the share of urban respondents clustered around 40 percent, with Burkina Faso being the lowest. Ethiopia’s share of urban respondents increased only slightly during the survey period. Nigeria’s and Malawi’s shares of urban respondents remained very consistent, other than a slight decline in urban respondents for Malawi in May 2021. Burkina Faso also had a slight decrease in the share of urban respondents in June 2020, however the share increased to just under 40 percent in August 2020 and remained steady throughout the rest of the survey period.

The bottom panel of Figure [A2](#) shows the share of female-headed household respondents was consistent across the period of interest. Ethiopia had the highest share of female-headed household respondents at about 30 percent. The other countries clustered around 20 percent, with Burkina Faso being the lowest. The share of female-headed household respondents was above 20 percent for Malawi, there was a slight increase in the share in May 2021 before decreasing in June 2021. In Nigeria and Burkina Faso the share of respondents was just below 20 percent, and remained consistent throughout the survey period.

### Additional Tables and Figures

- Figure [A1](#) presents the percentage response rates for LSMS-supported high frequency phone surveys on COVID-19, for each round.
- Tables [A1](#) through [A4](#) shows survey questions used to measure food insecurity in each country included in this study.
- Figures [A3](#) and [A4](#) show robustness checks for different ways of standardizing the FIES score.
- Figures [A5](#) through [A11](#) show event study results that disaggregate estimates of differential trends in food insecurity associated with the COVID-19 pandemic by survey wave.
- Tables [A5](#) through [A8](#) show tabular results with additional information corresponding to Figures [4](#) and [5](#) in the main manuscript.

Figure A1: Round-Specific Response Rates for LSMS-Supported High-Frequency Phone Surveys on COVID-19

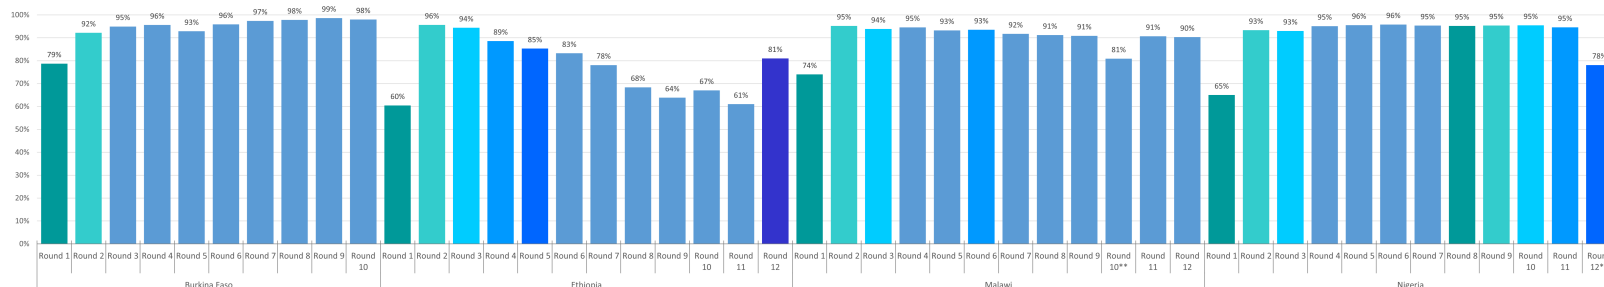

*Note:* The figure presents the percentage response rates for LSMS-supported high frequency phone surveys on COVID-19, for each round. Percentage response rates are calculated as the number of completed interviews over the number of attempted interviews. Later survey rounds (e.g. Round 2, Round 3) only attempt to contact respondents with completed interviews from prior round. \*\* signifies a survey round in which only Fielded Youth Aspirations and Employment Module were implemented. In Malawi, Round 10, this means there were only 1,136 had an eligible persons while in Nigeria, round 12, there were only 1,238 had an eligible persons.

Figure A2: Changes in Share of Urban/Rural and Male/Female Headed Households Over Time

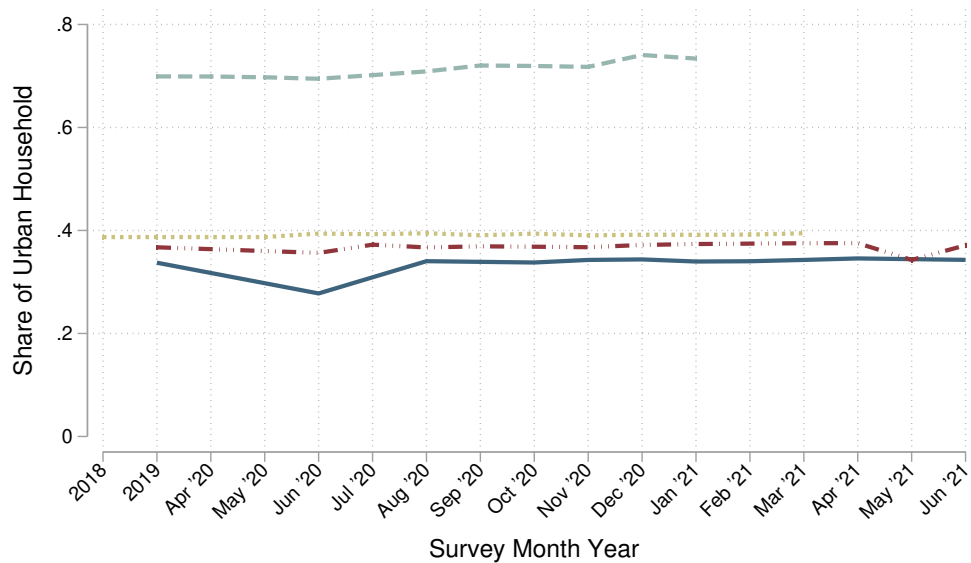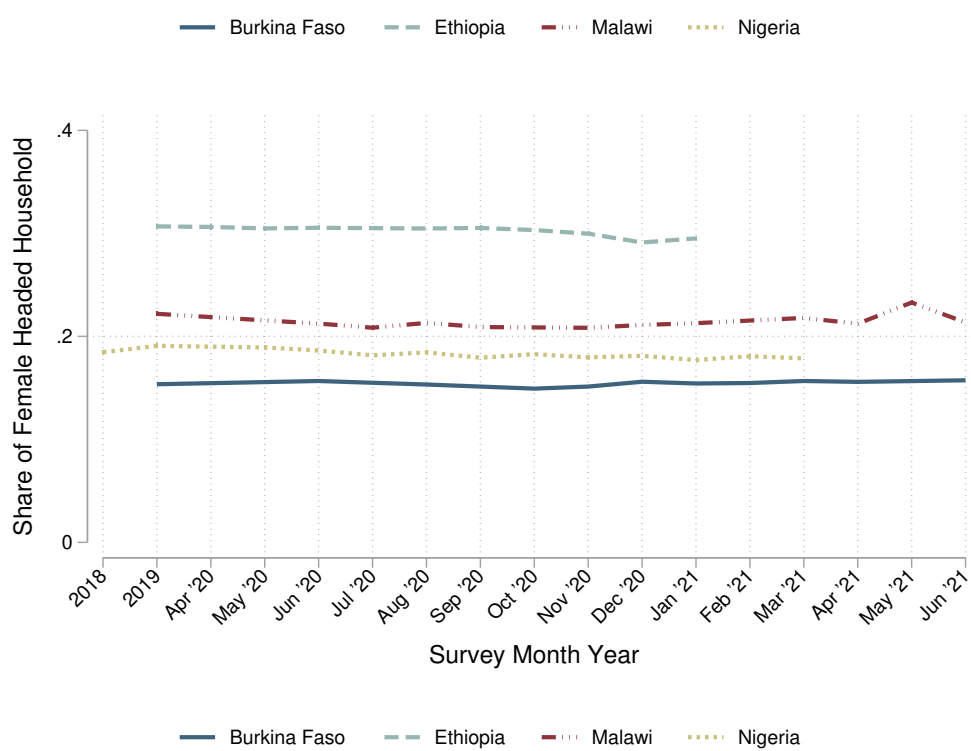

Note: The figure presents the share of urban households by country and wave as well as the share of female headed household by country and wave. All values are computed using survey weights.

Table A1: Food Insecurity Experience Scale (FIES) Questions in Burkina Faso

| FIES | Pre-COVID-19 Surveys                                                                                                                     |          | COVID-19 Surveys                                                                                                                      |        |
|------|------------------------------------------------------------------------------------------------------------------------------------------|----------|---------------------------------------------------------------------------------------------------------------------------------------|--------|
|      | Question                                                                                                                                 | Recall   | Question                                                                                                                              | Recall |
| FS1  | Have you or other members of your household worried about not having enough food, due to lack of resources?                              | 12 month | You or other members of your household have been worried about not having enough food due to lack of money or other resources?        | 30 day |
| FS2  | Have you or other household members been unable to eat healthy, nutritious food due to lack of money or other resources?                 | 12 month | You or other members of your household were unable to eat healthy and nutritious food due to lack of money or other resources?        | 30 day |
| FS3  | Have you or other household members eaten with little variety due to lack of money or other resources?                                   | 12 month | you or other members of your household have eaten not enough varied food due to lack of money or other resources?                     | 30 day |
| FS4  | Have you or other household members had to skip a meal because you did not have enough money or other resources to buy food?             | 12 month | You or other members of your household have had to skip a meal because you did not have enough money or other resources to buy food?  | 30 day |
| FS5  | Have you or other household members eaten less than you think you should because of a lack of money or other resources?                  | 12 month | You or other members of your household ate less than you thought you should have eaten due to lack of money or other resources?       | 30 day |
| FS6  | Has your household ran out of food because there was not enough money or other resources?                                                | 12 month | Your household run out of food because there was not enough money or other resources?                                                 | 30 day |
| FS7  | Have you or other members of your household been hungry but not eaten because there was not enough money or other resources to buy food? | 12 month | You or other members of your household felt hungry but did not eat because there was not enough money or other resources to buy food? | 30 day |
| FS8  | Did you or other members of the household go an entire day without eating because of lack of money or other resources?                   | 12 month | You or other members of your household go a whole day without eating due to lack of money or other resources?                         | 30 day |

Table A2: Food Insecurity Experience Scale (FIES) Questions in Ethiopia

| Pre-COVID-19 Surveys |                                                                                                                      | COVID-19 Surveys |                                                                                                                                                                           |        |
|----------------------|----------------------------------------------------------------------------------------------------------------------|------------------|---------------------------------------------------------------------------------------------------------------------------------------------------------------------------|--------|
| FIES                 | Question                                                                                                             | Recall           | Question                                                                                                                                                                  | Recall |
| FS1                  | Did you worry that your household would not have enough food?                                                        | 7 day            | Was there a time when you or any other adult in your household were worried about not having enough food to eat because of lack of money or other resources?              | 30 day |
| FS2                  | How many days have you or someone in your household had to rely on less preferred foods?                             | 7 day            | Was there a time when you, or any other adult in your household, were unable to eat healthy and nutritious/preferred foods because of a lack of money or other resources? | 30 day |
| FS3                  | How many days have you or someone in your household had to limit the variety of foods eaten?                         | 7 day            | Was there a time when you, or any other adult in your household, ate only a few kinds of foods because of a lack of money or other resources?                             | 30 day |
| FS4                  | How many days have you or someone in your household had to limit portion size at meal-times?                         | 7 day            | Was there a time when you or others in your household had to skip a meal because there was not enough money or other resources to get food?                               | 30 day |
| FS5                  | How many days have you or someone in your household had to reduce number of meals eaten in a day?                    | 7 day            | Was there a time when you or others in your household ate less than you thought you should because of a lack of money or other resources?                                 | 30 day |
| FS6                  | How many days have you had no food of any kind in your household?                                                    | 7 day            | Was there a time when your household ran out of food because of a lack of money or other resources?                                                                       | 30 day |
| FS7                  | How many days have you or someone in your household had to restrict consumption by adults for small children to eat? | 7 day            | Was there a time when you or others in your household were hungry but did not eat because there was not enough money or other resources for food?                         | 30 day |
| FS8                  | How many days have you or someone in your household had to go a whole day and night without eating anything?         | 7 day            | Was there a time when you or others in your household went without eating for a whole day because of a lack of money or other resources?                                  | 30 day |

Table A3: Food Insecurity Experience Scale (FIES) Questions in Malawi

| Pre-COVID-19 Surveys |                                                                                                                               |        | COVID-19 Surveys                                                                                                                                    |        |  |
|----------------------|-------------------------------------------------------------------------------------------------------------------------------|--------|-----------------------------------------------------------------------------------------------------------------------------------------------------|--------|--|
| FIES                 | Question                                                                                                                      | Recall | Question                                                                                                                                            | Recall |  |
| FS1                  | Did you worry that your household would not have enough food?                                                                 | 7 day  | You or any other adult in your household were worried about not having enough food to eat because of lack of money or other resources?              | 30 day |  |
| FS2                  | How many days have you or someone in your household had to rely on less preferred and/or less expensive foods?                | 7 day  | You, or any other adult in your household, were unable to eat healthy and nutritious/preferred foods because of a lack of money or other resources? | 30 day |  |
| FS3                  |                                                                                                                               | 7 day  | You, or any other adult in your household, ate only a few kinds of foods because of a lack of money or other resources?                             | 30 day |  |
| FS4                  | How many days have you or someone in your household had to reduce number of meals eaten in a day?                             | 7 day  | You, or any other adult in your household, had to skip a meal because there was not enough money or other resources to get food?                    | 30 day |  |
| FS5                  | How many days have you or someone in your household had to limit portion size at meal-times?                                  | 7 day  | You, or any other adult in your household, ate less than you thought you should because of a lack of money or other resources?                      | 30 day |  |
| FS6                  | How many days have you or someone in your household had to borrow food or rely on help from a friend or relative?             | 7 day  | Your household ran out of food because of a lack of money or other resources?                                                                       | 30 day |  |
| FS7                  | How many days have you or someone in your household had to restrict consumption by adults in order for small children to eat? | 7 day  | You, or any other adult in your household, were hungry but did not eat because there was not enough money or other resources for food?              | 30 day |  |
| FS8                  |                                                                                                                               | 7 day  | You, or any other adult in your household, went without eating for a whole day because of a lack of money or other resources?                       | 30 day |  |

Table A4: Food Insecurity Experience Scale (FIES) Questions in Nigeria

| Pre-COVID-19 Surveys |                                                                                                                                                     | COVID-19 Surveys |                                                                                                                                                     |        |
|----------------------|-----------------------------------------------------------------------------------------------------------------------------------------------------|------------------|-----------------------------------------------------------------------------------------------------------------------------------------------------|--------|
| FIES                 | Question                                                                                                                                            | Recall           | Question                                                                                                                                            | Recall |
| FS1                  | You or any other adult in your household worried about not having enough food to eat because of lack of money or other resources?                   | 30 day           | You or any other adult in your household were worried about not having enough food to eat because of lack of money or other resources?              | 30 day |
| FS2                  | You, or any other adult in your household, were unable to eat healthy and nutritious/preferred foods because of a lack of money or other resources? | 30 day           | You, or any other adult in your household, were unable to eat healthy and nutritious/preferred foods because of a lack of money or other resources? | 30 day |
| FS3                  | You, or any other adult in your household, ate only a few kinds of foods because of a lack of money or other resources?                             | 30 day           | You, or any other adult in your household, ate only a few kinds of foods because of a lack of money or other resources?                             | 30 day |
| FS4                  | You, or any other adult in your household, had to skip a meal because there was not enough money or other resources to get food?                    | 30 day           | You, or any other adult in your household, had to skip a meal because there was not enough money or other resources to get food?                    | 30 day |
| FS5                  | You, or any other adult in your household, restricted consumption in order for children to eat?                                                     | 30 day           | You, or any other adult in your household, ate less than you thought you should because of a lack of money or other resources?                      | 30 day |
| FS6                  | You, or any other adult in your household, borrowed food, or relied on help from a friend or relative?                                              | 30 day           | Your household ran out of food because of a lack of money or other resources?                                                                       | 30 day |
| FS7                  | You, or any other adult in your household, restricted consumption in order for children to eat?                                                     | 30 day           | You, or any other adult in your household, were hungry but did not eat because there was not enough money or other resources for food?              | 30 day |
| FS8                  | You, or any other adult in your household, went without eating for a whole day because of a lack of money or other resources?                       | 30 day           | You, or any other adult in your household, went without eating for a whole day because of a lack of money or other resources?                       | 30 day |

Figure A3: Urban-Rural Differences in Food Insecurity for Different Standardizations

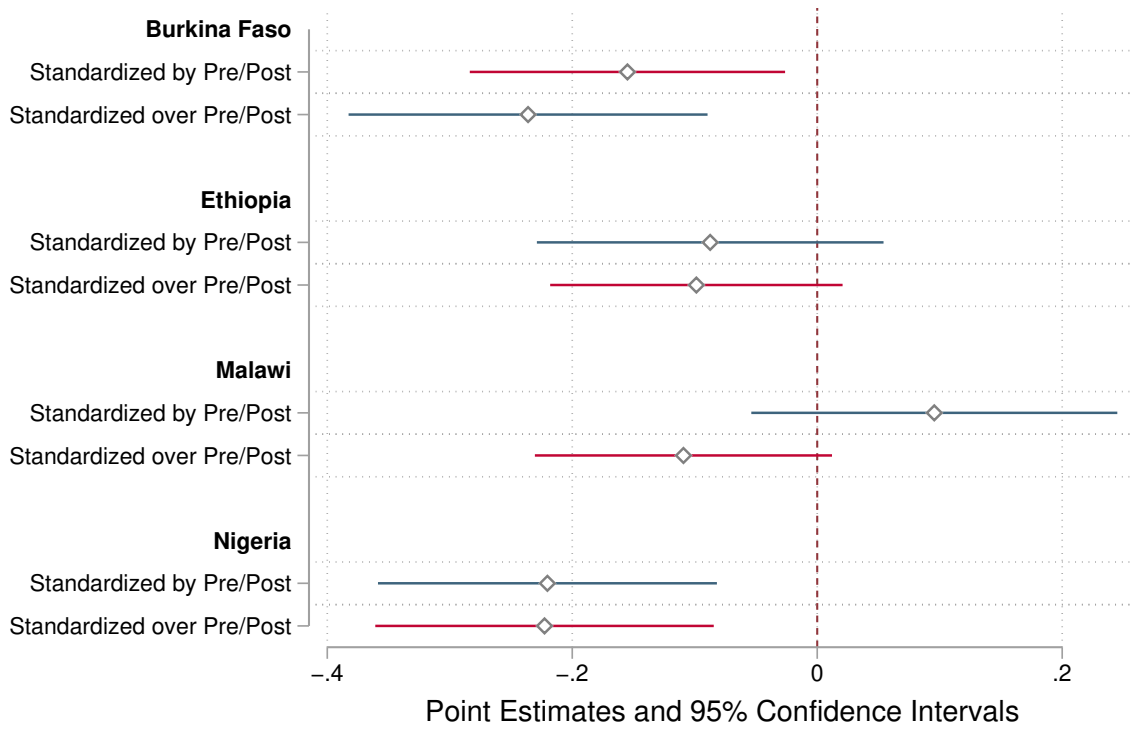

*Note:* This figure reports coefficients and 95% confidence intervals when estimating differences between urban and rural households before and during the pandemic for two different standardization methods. Standardized by Pre/Post is our preferred method and is presented in the main body of the paper. This method standardizes the FIES score, by country, for pre-outbreak data and then standardizes post-outbreak data separately. Standardized over Pre/Post standardizes the FIES score by country only, without regard to whether or not the data was collected pre- or post-outbreak. This analysis uses data from before and after the COVID-19 outbreak.



Figure A4: Female-Male Headed Household Differences in Food Insecurity for Different Standardizations

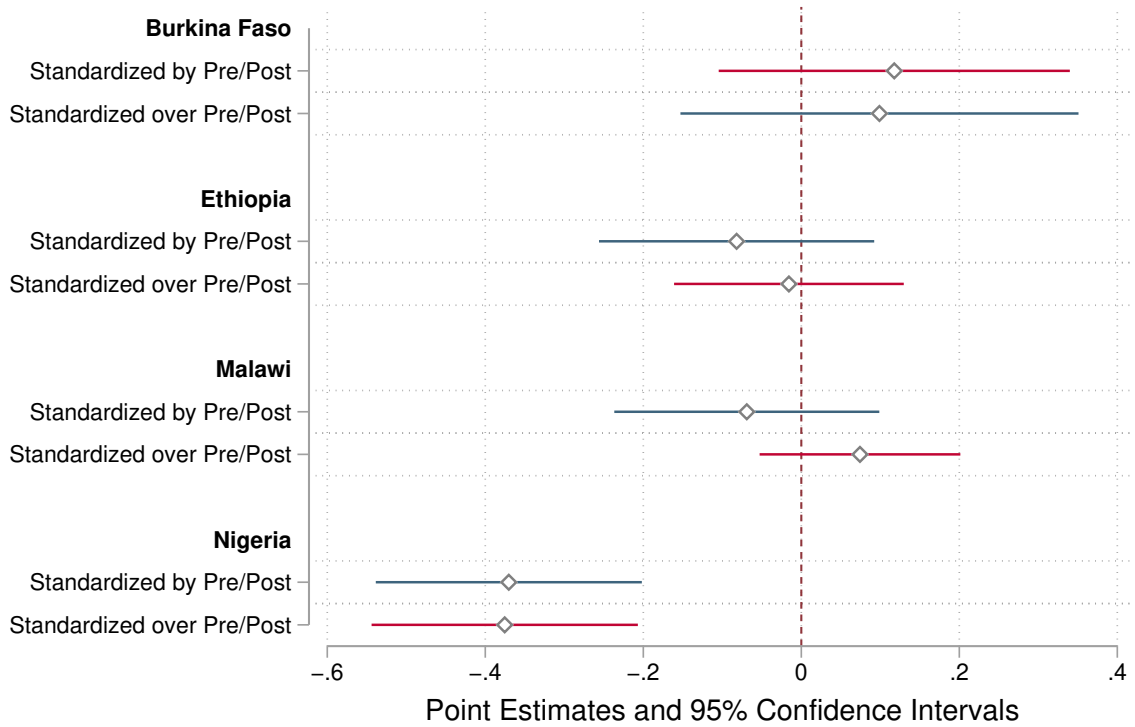

*Note:* This figure reports coefficients and 95% confidence intervals when estimating differences between female-headed and male-headed households before and during the pandemic for two different standardization methods. Standardized by Pre/Post is our preferred method and is presented in the main body of the paper. This method standardizes the FIES score, by country, for pre-outbreak data and then standardizes post-outbreak data separately. Standardized over Pre/Post standardizes the FIES score by country only, without regard to whether or not the data was collected pre- or post-outbreak. This analysis uses data from before and after the COVID-19 outbreak.

Figure A5: Event Study—Female-Male Headed Household Differences in Food Insecurity

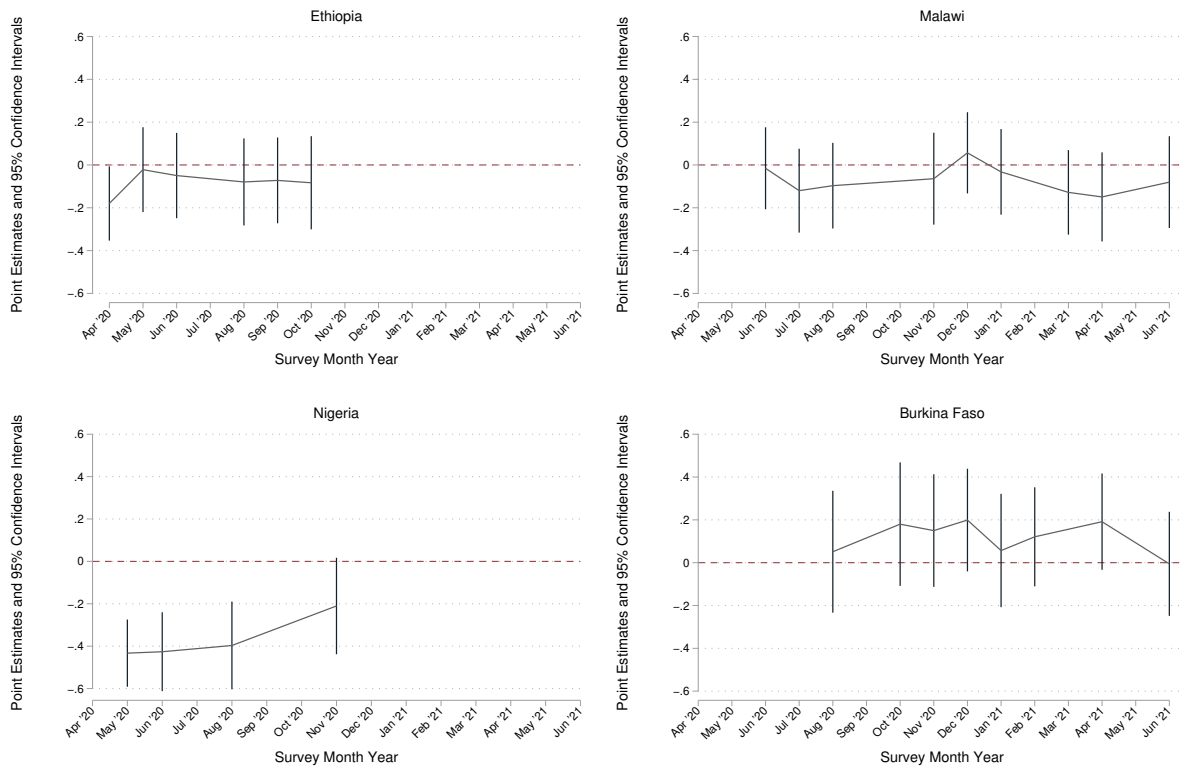

*Note:* This figure disaggregates estimates of differential trends in food insecurity, as measured with the standardized raw FIES score, by country and wave. When the coefficient is positive, this implies that female-headed households experienced a larger increase in the given measure of food insecurity since before the pandemic, relative to male-headed households. When the coefficient estimate is negative, the implies that male-headed households experienced a larger increase in food insecurity. This analysis uses data from before and after the COVID-19 outbreak.

Figure A6: Event Study—Urban-Rural Differences in Mild Food Insecurity

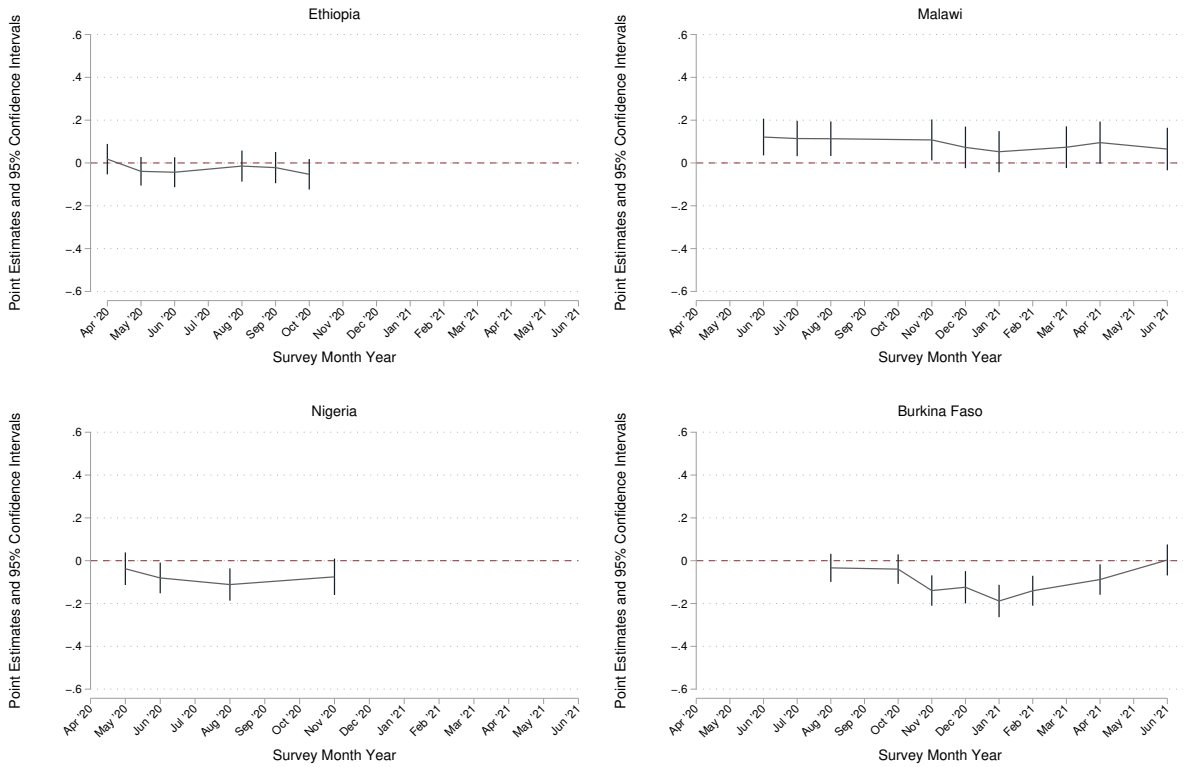

*Note:* This figure disaggregates estimates of differential trends in food insecurity, as measured with a binary indicator measuring mild food insecurity, by country and wave. When the coefficient is positive, this implies that households in urban areas experienced a larger increase in the given measure of food insecurity, since before the pandemic, relative to rural households. When the coefficient estimate is negative, this implies that households in rural areas experienced a larger increase in food insecurity. This analysis uses data from before and after the COVID-19 outbreak.

Figure A7: Event Study—Female-Male Headed Household Differences in Mild Food Insecurity

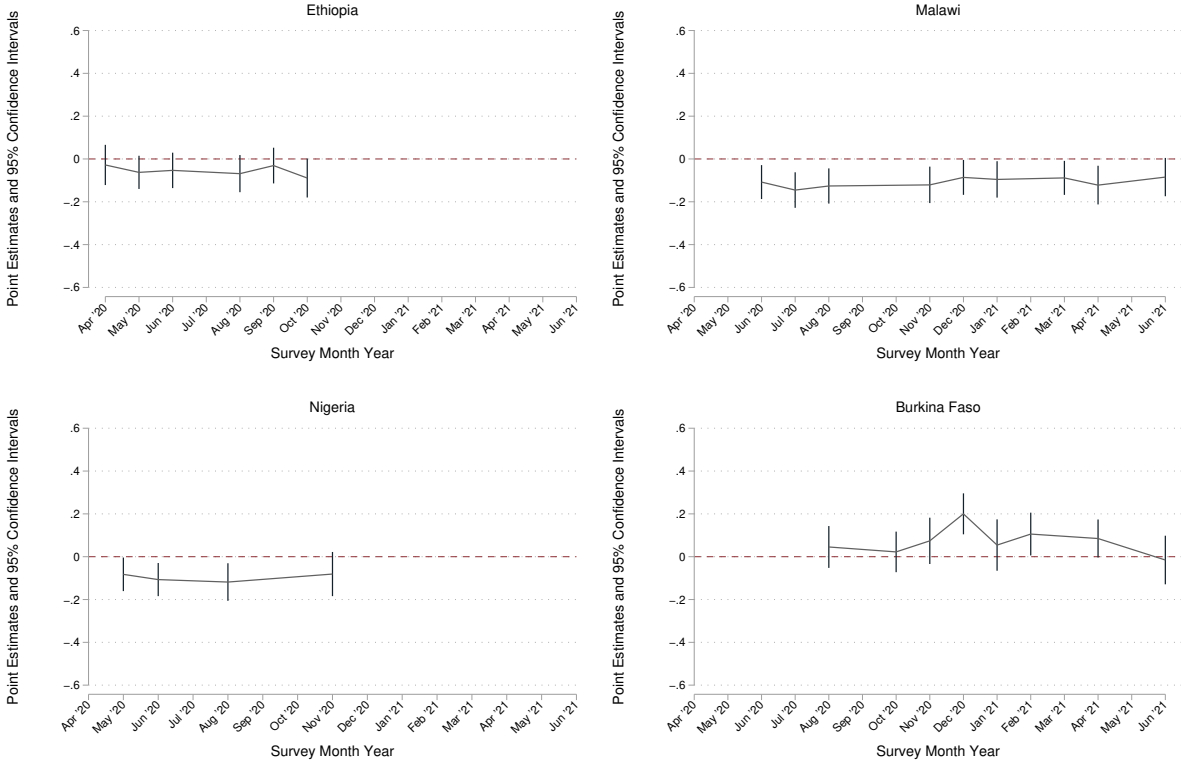

*Note:* This figure disaggregates estimates of differential trends in food insecurity, as measured with a binary indicator measuring mild food insecurity, by country and wave. When the coefficient is positive, this implies that female-headed households experienced a larger increase in the given measure of food insecurity since before the pandemic, relative to male-headed households. When the coefficient estimate is negative, the implies that male-headed households experienced a larger increase in food insecurity. This analysis uses data from before and after the COVID-19 outbreak.

Figure A8: Event Study—Urban-Rural Differences in Moderate Food Insecurity

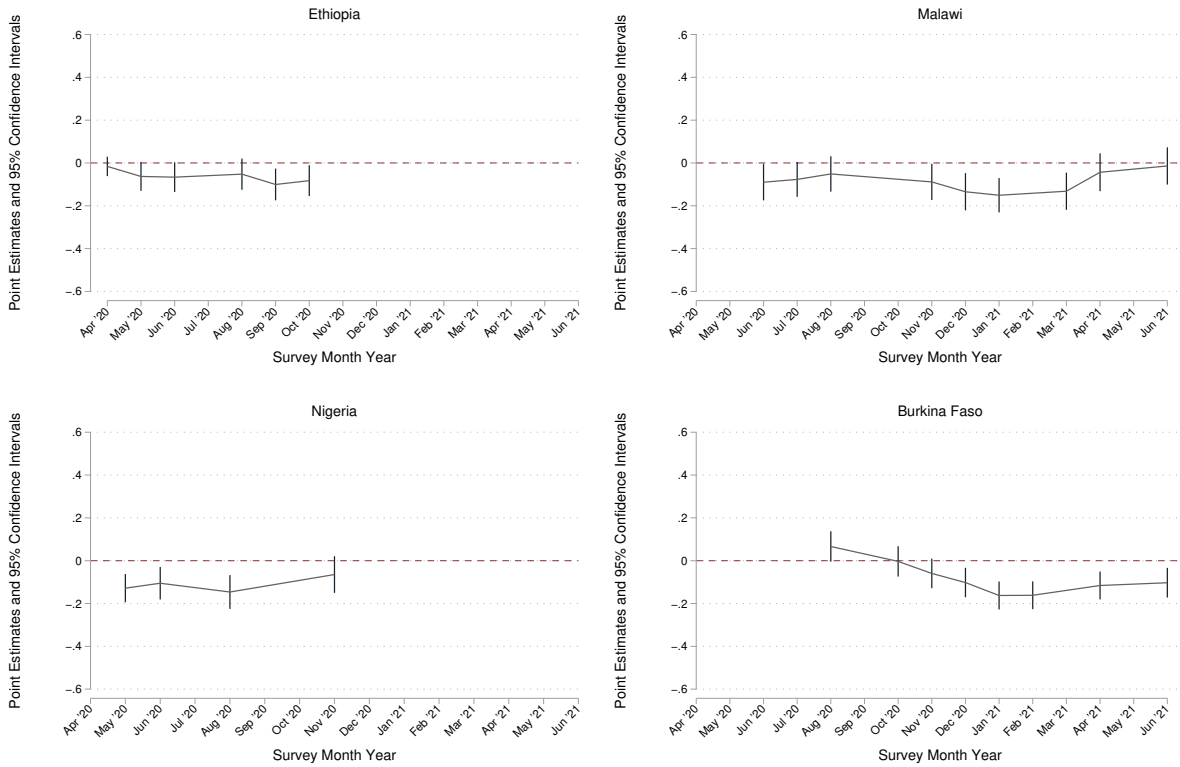

*Note:* This figure disaggregates estimates of differential trends in food insecurity, as measured with a binary indicator measuring moderate food insecurity, by country and wave. When the coefficient is positive, this implies that households in urban areas experienced a larger increase in the given measure of food insecurity, since before the pandemic, relative to rural households. When the coefficient estimate is negative, this implies that households in rural areas experienced a larger increase in food insecurity. This analysis uses data from before and after the COVID-19 outbreak.

Figure A9: Event Study—Female-Male Headed Household Differences in Moderate Food Insecurity

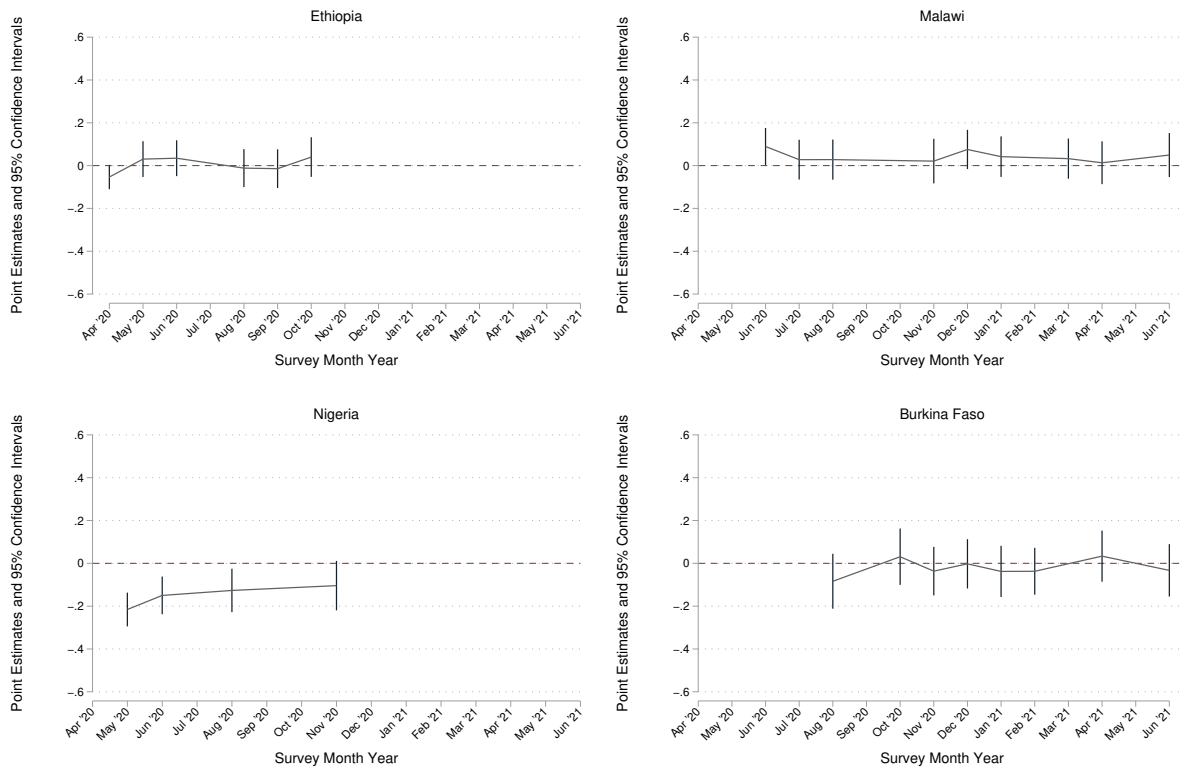

Note: This figure disaggregates estimates of differential trends in food insecurity, as measured with a binary indicator measuring moderate food insecurity, by country and wave. When the coefficient is positive, this implies that female-headed households experienced a larger increase in the given measure of food insecurity since before the pandemic, relative to male-headed households. When the coefficient estimate is negative, the implies that male-headed households experienced a larger increase in food insecurity. This analysis uses data from before and after the COVID-19 outbreak.

Figure A10: Event Study—Urban-Rural Differences in Severe Food Insecurity

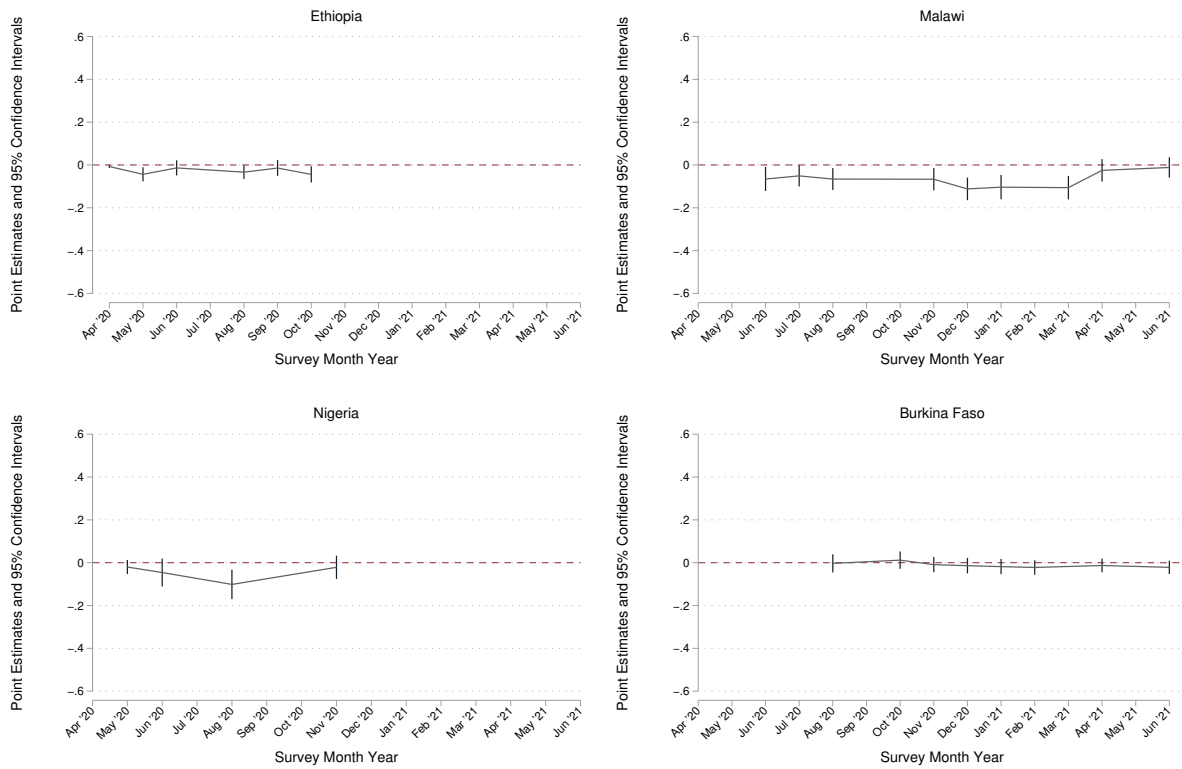

*Note:* This figure disaggregates estimates of differential trends in food insecurity, as measured with a binary indicator measuring severe food insecurity, by country and wave. When the coefficient is positive, this implies that households in urban areas experienced a larger increase in the given measure of food insecurity, since before the pandemic, relative to rural households. When the coefficient estimate is negative, this implies that households in rural areas experienced a larger increase in food insecurity. This analysis uses data from before and after the COVID-19 outbreak.

Figure A11: Event Study—Female-Male Headed Household Differences in Severe Food Insecurity

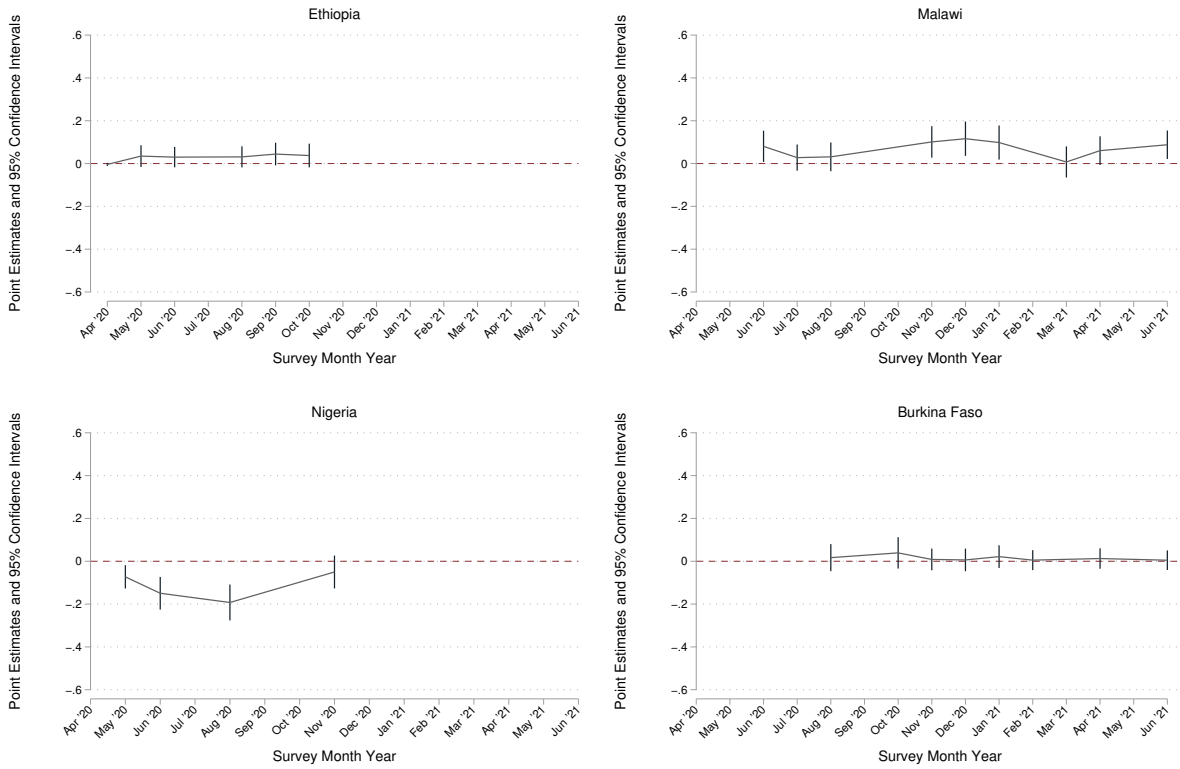

Note: This figure disaggregates estimates of differential trends in food insecurity, as measured with a binary indicator measuring severe food insecurity, by country and wave. When the coefficient is positive, this implies that female-headed households experienced a larger increase in the given measure of food insecurity since before the pandemic, relative to male-headed households. When the coefficient estimate is negative, the implies that male-headed households experienced a larger increase in food insecurity. This analysis uses data from before and after the COVID-19 outbreak.



Table A5: The Coronavirus and Standardized Raw FIES Score

|                              | Urban-Rural          | Female-Male          |
|------------------------------|----------------------|----------------------|
| <b>Panel A: Burkina Faso</b> |                      |                      |
| COVID                        | -0.085<br>(0.046)    | -0.205***<br>(0.047) |
| Urban                        | 0.378***<br>(0.061)  |                      |
| COVID × Urban                | -0.155*<br>(0.066)   |                      |
| Female                       |                      | 0.065<br>(0.098)     |
| COVID × Female               |                      | 0.118<br>(0.11)      |
| Observations                 | 17974                | 17974                |
| R <sup>2</sup>               | 0.061                | 0.051                |
| Baseline Mean                | -0.256               | -0.009               |
| <b>Panel B: Ethiopia</b>     |                      |                      |
| COVID                        | 0.100<br>(0.064)     | 0.089<br>(0.056)     |
| Urban                        | -0.038<br>(0.065)    |                      |
| COVID × Urban                | -0.087<br>(0.072)    |                      |
| Female                       |                      | 0.258**<br>(0.085)   |
| COVID × Female               |                      | -0.082<br>(0.089)    |
| Observations                 | 21008                | 21008                |
| R <sup>2</sup>               | 0.110                | 0.114                |
| Baseline Mean                | 0.012                | -0.063               |
| <b>Panel C: Malawi</b>       |                      |                      |
| COVID                        | -0.393***<br>(0.052) | -0.355***<br>(0.053) |
| Urban                        | -0.494***<br>(0.068) |                      |
| COVID × Urban                | 0.096<br>(0.076)     |                      |
| Female                       |                      | 0.346***<br>(0.079)  |
| COVID × Female               |                      | -0.069<br>(0.086)    |
| Observations                 | 16102                | 16102                |
| R <sup>2</sup>               | 0.047                | 0.036                |
| Baseline Mean                | 0.095                | -0.092               |
| <b>Panel D: Nigeria</b>      |                      |                      |
| COVID                        | 0.304***<br>(0.046)  | 0.307***<br>(0.043)  |
| Urban                        | 0.255***<br>(0.067)  |                      |
| COVID × Urban                | -0.220**<br>(0.071)  |                      |
| Female                       |                      | 0.470***<br>(0.082)  |
| COVID × Female               |                      | -0.370***<br>(0.086) |
| Observations                 | 9235                 | 9235                 |
| R <sup>2</sup>               | 0.227                | 0.233                |
| Baseline Mean                | -0.068               | -0.080               |

*Note:* Dependent variable is the standardized raw FIES score weighted using household survey weights. Baseline Mean represents the pre-pandemic mean of the outcome variable in the comparison area — e.g., rural areas in the first column and male headed households in the second column. Each regression includes round fixed effects and a set of indicator variables to control for when household skip or refuse to answer a specific FIES question. Robust standard errors clustered at the household-level are reported in parentheses (\*  $p < 0.10$ , \*\*  $p < 0.05$ , \*\*\*  $p < 0.01$ ).

Table A6: The Coronavirus and Mild Food Insecurity

|                              | Urban-Rural          | Female-Male         |
|------------------------------|----------------------|---------------------|
| <b>Panel A: Burkina Faso</b> |                      |                     |
| COVID                        | 0.047*<br>(0.023)    | -0.025<br>(0.022)   |
| Urban                        | 0.229***<br>(0.028)  |                     |
| COVID × Urban                | -0.094**<br>(0.029)  |                     |
| Female                       |                      | 0.003<br>(0.042)    |
| COVID × Female               |                      | 0.071<br>(0.042)    |
| Observations                 | 17974                | 17974               |
| R <sup>2</sup>               | 0.039                | 0.019               |
| Baseline Mean                | 0.530                | 0.685               |
| <b>Panel B: Ethiopia</b>     |                      |                     |
| COVID                        | 0.318***<br>(0.027)  | 0.322***<br>(0.023) |
| Urban                        | -0.051<br>(0.028)    |                     |
| COVID × Urban                | -0.025<br>(0.030)    |                     |
| Female                       |                      | 0.124***<br>(0.036) |
| COVID × Female               |                      | -0.055<br>(0.037)   |
| Observations                 | 21008                | 21008               |
| R <sup>2</sup>               | 0.130                | 0.130               |
| Baseline Mean                | 0.359                | 0.312               |
| <b>Panel C: Malawi</b>       |                      |                     |
| COVID                        | 0.121***<br>(0.024)  | 0.167***<br>(0.025) |
| Urban                        | -0.231***<br>(0.038) |                     |
| COVID × Urban                | 0.091*<br>(0.040)    |                     |
| Female                       |                      | 0.178***<br>(0.036) |
| COVID × Female               |                      | -0.109**<br>(0.037) |
| Observations                 | 16102                | 16102               |
| R <sup>2</sup>               | 0.059                | 0.045               |
| Baseline Mean                | 0.666                | 0.574               |
| <b>Panel D: Nigeria</b>      |                      |                     |
| COVID                        | 0.258***<br>(0.024)  | 0.254***<br>(0.023) |
| Urban                        | 0.090**<br>(0.034)   |                     |
| COVID × Urban                | -0.075*<br>(0.035)   |                     |
| Female                       |                      | 0.159***<br>(0.037) |
| COVID × Female               |                      | -0.097*<br>(0.038)  |
| Observations                 | 9235                 | 9235                |
| R <sup>2</sup>               | 0.091                | 0.096               |
| Baseline Mean                | 0.591                | 0.594               |

*Note:* Dependent variable is mild food insecurity weighted using household survey weights. Baseline Mean represents the pre-pandemic mean of the outcome variable in the comparison area — e.g., rural areas in the first column and male headed households in the second column. Each regression includes round fixed effects and a set of indicator variables to control for when household skip or refuse to answer a specific FIES question. Robust standard errors clustered at the household-level are reported in parentheses (\*  $p < 0.10$ , \*\*  $p < 0.05$ , \*\*\*  $p < 0.01$ ).

Table A7: The Coronavirus and Moderate Food Insecurity

|                              | Urban-Rural          | Female-Male          |
|------------------------------|----------------------|----------------------|
| <b>Panel A: Burkina Faso</b> |                      |                      |
| COVID                        | -0.138***<br>(0.020) | -0.189***<br>(0.021) |
| Urban                        | 0.151***<br>(0.028)  |                      |
| COVID × Urban                | -0.079**<br>(0.029)  |                      |
| Female                       |                      | 0.064<br>(0.048)     |
| COVID × Female               |                      | -0.021<br>(0.052)    |
| Observations                 | 17974                | 17974                |
| R <sup>2</sup>               | 0.059                | 0.051                |
| Baseline Mean                | 0.248                | 0.341                |
| <b>Panel B: Ethiopia</b>     |                      |                      |
| COVID                        | 0.237***<br>(0.027)  | 0.215***<br>(0.024)  |
| Urban                        | 0.016<br>(0.023)     |                      |
| COVID × Urban                | -0.062*<br>(0.028)   |                      |
| Female                       |                      | 0.053<br>(0.029)     |
| COVID × Female               |                      | 0.004<br>(0.034)     |
| Observations                 | 21008                | 21008                |
| R <sup>2</sup>               | 0.133                | 0.134                |
| Baseline Mean                | 0.139                | 0.131                |
| <b>Panel C: Malawi</b>       |                      |                      |
| COVID                        | 0.343***<br>(0.025)  | 0.316***<br>(0.024)  |
| Urban                        | -0.086***<br>(0.026) |                      |
| COVID × Urban                | -0.087**<br>(0.033)  |                      |
| Female                       |                      | 0.063<br>(0.033)     |
| COVID × Female               |                      | 0.043<br>(0.039)     |
| Observations                 | 16102                | 16102                |
| R <sup>2</sup>               | 0.123                | 0.113                |
| Baseline Mean                | 0.193                | 0.160                |
| <b>Panel D: Nigeria</b>      |                      |                      |
| COVID                        | 0.290***<br>(0.024)  | 0.284***<br>(0.022)  |
| Urban                        | 0.128***<br>(0.034)  |                      |
| COVID × Urban                | -0.112***<br>(0.034) |                      |
| Female                       |                      | 0.216***<br>(0.040)  |
| COVID × Female               |                      | -0.152***<br>(0.042) |
| Observations                 | 9235                 | 9235                 |
| R <sup>2</sup>               | 0.332                | 0.337                |
| Baseline Mean                | 0.373                | 0.375                |

*Note:* Dependent variable is moderate food insecurity weighted using household survey weights. Baseline Mean represents the pre-pandemic mean of the outcome variable in the comparison area — e.g., rural areas in the first column and male headed households in the second column. Each regression includes random fixed effects and a set of indicator variables to control for when household skip or refuse to answer a specific FIES question. Robust standard errors clustered at the household-level are reported in parentheses (\*  $p < 0.10$ , \*\*  $p < 0.05$ , \*\*\*  $p < 0.01$ ).

Table A8: The Coronavirus and Severe Food Insecurity

|                              | Urban-Rural          | Female-Male           |
|------------------------------|----------------------|-----------------------|
| <b>Panel A: Burkina Faso</b> |                      |                       |
| COVID                        | -0.046***<br>(0.011) | -0.056***<br>(0.0097) |
| Urban                        | 0.015<br>(0.015)     |                       |
| COVID × Urban                | -0.011<br>(0.016)    |                       |
| Female                       |                      | -0.003<br>(0.023)     |
| COVID × Female               |                      | 0.014<br>(0.024)      |
| Observations                 | 17974                | 17974                 |
| R <sup>2</sup>               | 0.014                | 0.014                 |
| Baseline Mean                | 0.051                | 0.051                 |
| <b>Panel B: Ethiopia</b>     |                      |                       |
| COVID                        | 0.082***<br>(0.013)  | 0.067***<br>(0.011)   |
| Urban                        | 0.007*<br>(0.0035)   |                       |
| COVID × Urban                | -0.026*<br>(0.010)   |                       |
| Female                       |                      | 0.004<br>(0.0036)     |
| COVID × Female               |                      | 0.028<br>(0.015)      |
| Observations                 | 21008                | 21008                 |
| R <sup>2</sup>               | 0.025                | 0.027                 |
| Baseline Mean                | 0.000                | 0.000                 |
| <b>Panel C: Malawi</b>       |                      |                       |
| COVID                        | 0.089***<br>(0.012)  | 0.059***<br>(0.011)   |
| Urban                        | 0.000<br>(.)         |                       |
| COVID × Urban                | -0.067***<br>(0.019) |                       |
| Female                       |                      | 0.000<br>(3.8e-09)    |
| COVID × Female               |                      | 0.068**<br>(0.022)    |
| Observations                 | 16102                | 16102                 |
| R <sup>2</sup>               | 0.034                | 0.035                 |
| Baseline Mean                | 0.000                | 0.000                 |
| <b>Panel D: Nigeria</b>      |                      |                       |
| COVID                        | 0.083***<br>(0.014)  | 0.091***<br>(0.012)   |
| Urban                        | 0.020<br>(0.017)     |                       |
| COVID × Urban                | -0.047*<br>(0.022)   |                       |
| Female                       |                      | 0.073**<br>(0.028)    |
| COVID × Female               |                      | -0.116***<br>(0.031)  |
| Observations                 | 9235                 | 9235                  |
| R <sup>2</sup>               | 0.092                | 0.094                 |
| Baseline Mean                | 0.083                | 0.083                 |

*Note:* Dependent variable is severe food insecurity weighted using household survey weights. Baseline Mean represents the pre-pandemic mean of the outcome variable in the comparison area — e.g., rural areas in the first column and male headed households in the second column. Each regression includes random fixed effects and a set of indicator variables to control for when household skip or refuse to answer a specific FIES question. Robust standard errors clustered at the household-level are reported in parentheses (\*  $p < 0.10$ , \*\*  $p < 0.05$ , \*\*\*  $p < 0.01$ ).
